# Supplementary material for: Simulating neuronal development: exploring potential mechanisms for central nervous system metastasis in acute lymphoblastic leukemia
Source: PubMed Central journal article supplement (PMC10794646; doi:10.3389/fonc.2023.1331802), 2024-01-04
Supplement: DataSheet_1.pdf [file DataSheet_1.pdf]

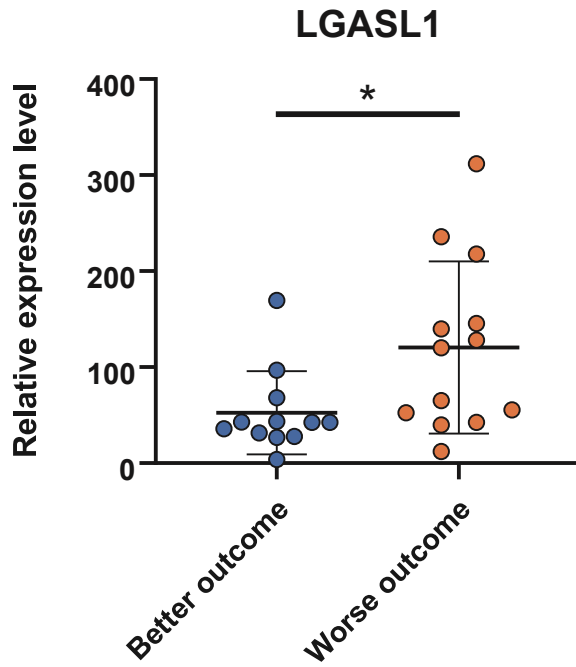

Supplementary Figure 1: GEO data analysis (GSE5820) revealing LGALS1 is upregulated in ALL patients with worse clinical outcome.
